# Supplementary material for: Selection and Validation of Endogenous Reference Genes for qRT-PCR Analysis in Leafy Spurge (Euphorbia esula)
Source: PLoS One. 2012 Aug 14;7(8):e42839. doi: 10.1371/journal.pone.0042839 (PMC3419244; doi:10.1371/journal.pone.0042839)
Supplement: Table S3 — Candidate reference genes examined in seed samples. (XLSX) [file pone.0042839.s003.xlsx]

## Sheet: Table S3_Seed_07 & 08
Supplementary Table 3. Candidate reference genes examined in seed samples
			2007 seed samples														2008 seed samples
YORF	NAME	GWEIGHT	Dry Seed	1d C	2d C	3d C	21d C	1d A	2d A	3d A	21d A	Germ A	21d C + 1d A	21d C + 2d A	21d C + 3d A	21d C + Germ A	Dry Seed	1d C	2d C	3d C	21d C	1d A	2d A	3d A	21d A	Germ A	21d C + 1d A	21d C + 2d A	21d C + 3d A	21d C + Germ A
EWEIGHT			1	1	1	1	1	1	1	1	1	1	1	1	1	1	1	1	1	1	1	1	1	1	1	1	1	1	1	1
2	BAM4 (342)	1	0	1.5468	1.87755	2.1909	1.44645	2.6004	2.3292	2.5991	1.4105	0.94515	0.75455	1.0227	0.6971	1.3487	0	1.3741	1.7157	1.7696	0.80675	2.6971	2.4126	1.89595	1.18255	1.0621	0.08295	0.9216	1.3181	1.46295
5	PU1 (350)	1	0	0.209	0.02235	0.27065	0.4299	0.2393	0.7098	0.8976	0.348	1.87545	0.6976	0.79035	0.06	2.01455	0	-0.44055	-0.0836	0.2559	0.9249	0.54145	0.7478	0.49145	0.88185	1.81155	1.35975	1.2762	1.1876	1.84
43	TPR-like (458)	1	0	0.5114	-0.12075	-0.27885	-0.84255	0.0736	0.25295	0.13285	-0.21705	1.75475	-0.7924	-0.02445	-0.16445	2.07995	0	-0.2036	-0.052	-0.6013	-0.3467	0.4669	0.4577	0.19635	0.31085	1.63085	0.52145	0.7342	0.82855	1.76055
54	FRO1 (479)	1	0	0.1134	-0.34275	-0.14165	-1.24325	0.01015	0.19275	0.293	-0.62875	2.4303	0.3894	0.94015	2.002	4.01245	0	-0.1679	-0.62525	-0.3915	-1.068	0.32725	0.22385	-0.0004	-0.11435	2.36145	0.98785	1.97635	2.38145	3.86235
60	ORE9 (491)	1	0	0.74435	0.5386	0.65885	0.3742	0.83885	0.93145	1.32825	0.433	1.718	0.72465	0.0541	0.23725	2.31515	0	-0.0871	0.38895	0.4145	0.9528	0.85335	0.955	0.81955	1.1341	1.6686	0.83805	0.82465	1.1753	1.9811
1	BAM1 (358, )	1	0	-0.5886	-0.3232	-0.26985	-0.03175	-0.1637	-0.6982	-0.2533	0.01115	-0.3458	0.1058	0.0423	0.6948	0.48955	0	0.27075	0.08385	0.29715	0.1177	0.7264	0.60715	0.0156	0.43235	0.47735	0.26975	0.06405	1.58865	0.905
5	SEU (577, 11805)	1	0	-1.12035	0.41815	0.4091	0.12995	0.29635	0.8208	-0.03235	-0.5783	1.4799	-0.15405	-0.86735	0.13375	1.17425	0	-0.1585	0.42755	0.5675	0.67635	0.9855	0.994	0.1113	0.1284	0.4036	0.32695	-0.43495	0.7648	0.3302
15	ARF2 (638, 3066)	1	0	-1.0786	-0.49545	0.1806	0.2462	-0.30405	-0.01215	-0.12645	-0.3312	1.8872	-0.18815	-0.18	-0.1791	1.2695	0	-0.29055	0.1389	0.3579	0.53765	0.4436	0.6561	0.25055	0.3217	0.6067	0.82385	-0.00555	0.50535	0.5226
17	KAPP (649, 12953)	1	0	-0.8182	-0.03135	0.7222	0.23855	0.15755	0.67805	0.3265	-0.17795	1.2181	-0.38685	0.05935	0.38375	1.18985	0	-0.06825	0.50515	0.4919	0.4071	0.554	0.8037	0.64895	0.09005	-0.24205	-0.5873	-0.4344	0.5972	0.00035
18	ZTL (650, 5656)	1	0	-1.31835	-0.7767	-0.3519	-0.45755	-0.42105	-0.2142	-0.60335	-0.99065	0.26625	-0.91505	-0.41905	-1.05515	-0.0913	0	-0.7991	-0.34965	-0.15125	-0.11435	-0.1054	-0.0381	-0.2821	-0.3828	-1.1115	-0.2623	-1.0471	-0.3702	-0.4743
19	MPK4 (651, 19743)	1	0	0.0497	-0.41565	0.0162	0.4911	0.6611	0.4761	0.47795	0.873	1.6786	0.2141	0.5143	0.8236	1.9579	0	-0.2845	-0.24045	-0.02165	0.2782	0.73865	0.53465	0.40625	0.4669	1.42085	0.45985	0.57675	1.07575	1.47805
20	MD-100 (9789)	1	0	-0.8665	-0.4538	1.4304	1.82235	0.207	1.2679	1.06905	1.53075	4.2883	1.6123	2.273	1.8512	3.9134	0	0.30525	0.82975	1.69065	2.2636	0.8208	1.17165	0.8408	1.7881	3.1093	1.96475	2.04025	3.0232	3.10135
6	60S (623, 11237)	1	0	-0.63945	-0.52615	0.87035	0.94495	-0.1958	0.55145	0.0238	0.0915	3.93575	0.921	1.40525	1.66785	3.8771	0	-0.09745	0.2061	0.8404	1.3845	0.3723	0.1839	0.0262	1.0619	2.47455	1.42455	1.7159	2.05075	2.96895
7	BZIP21 (624, 7235)	1	0	-1.6814	-1.012	-0.38135	-0.7003	-0.7072	-0.63065	-0.82975	-1.4334	0.35115	-0.88195	-0.42355	-0.83385	0.1019	0	-0.96935	-0.7473	-0.52355	-0.1902	-0.3532	-0.4371	-0.7633	-0.7588	-1.17055	0.1677	-0.2223	-0.19475	-1.24725
8	GAPDH_1 (626, 693)	1	0	0.62415	0.08265	0.54845	-1.18565	1.83475	0.86915	0.1415	-1.0765	3.60195	-1.2947	0.1023	1.43255	3.9209	0	1.1286	0.75805	-0.1679	-0.6558	1.94935	1.22065	1.16055	-0.29885	3.01415	-0.62525	1.5616	2.4466	4.0037
9	GAPDH_2 (627, 2771)	1	0	-0.24375	-0.2845	0.92955	0.677	0.5123	0.69305	-0.05445	-0.3057	3.70885	0.35335	0.75635	0.8369	3.51815	0	-0.0493	0.3405	0.50125	0.7632	0.22065	0.256	0.12595	0.33945	2.51565	0.54995	0.7272	0.88535	2.63605
10	UBC (628, 19659)	1	0	0.091	0.25775	0.79915	0.1919	0.4398	0.6872	0.3012	-0.006	2.61835	0.0096	-0.0474	0.2392	2.19725	0	0.3216	0.67675	0.3431	0.1993	0.67545	0.6195	0.25815	0.10605	1.08785	0.2827	0.68875	0.4693	1.3705
11	UBC9 (629, 9813)	1	0	2.7922	3.38635	3.3465	2.3034	3.7137	3.7523	3.169	2.3879	1.4117	1.58305	1.50135	1.6504	2.6707	0	3.01285	2.8059	3.0234	1.2079	2.89715	3.045	3.08995	0.53775	1.6029	-1.2191	0.128	1.5337	2.0247
12	SAND (634, 10292)	1	0	-0.99175	-0.51785	0.21955	0.1507	-0.09945	0.18345	-0.24525	-0.04155	1.1876	-0.15755	0.29305	0.18235	1.17825	0	-0.32335	0.00355	0.3164	0.40245	0.43225	0.3731	0.2668	0.24065	0.21735	0.3486	0.3621	0.3377	0.2827
13	PTB (635, 4326)	1	0	-0.60365	-0.6735	0.06865	-0.6706	-0.3981	-0.0341	-0.4971	-0.77425	2.52735	-0.2343	0.05785	-0.00885	2.41145	0	-0.1156	0.14505	0.0922	0.2511	0.3406	0.1424	0.03295	-0.05355	1.34965	0.41865	0.46875	0.7651	2.1027
14	F-box (637, 15747)	1	0	-0.96335	-1.13675	0.39295	-0.04805	-0.7514	0.3721	0.0082	-1.3606	8.0038	0.4093	2.5816	2.00935	7.159	0	-1.2178	-0.90955	0.06875	-0.1629	-0.089	-0.1549	0.3161	0.8506	5.78925	1.79525	2.71785	2.8516	5.9419
